# Supplementary material for: Expression of human Bcl-xL (Ser49) and (Ser62) mutants in Caenorhabditis elegans causes germline defects and aneuploidy
Source: PubMed Central journal article supplement (PMC5421811; doi:10.1371/journal.pone.0177413), 2017-05-08
Supplement: pone.0177413.s005.pdf [file pone.0177413.s005.pdf]

**S1 Table Vector design and transgenic strains**

| <b>Vector design</b>                                       | <b>Transgenic strain ID</b>         |
|------------------------------------------------------------|-------------------------------------|
| <i>unc-119 ced-9</i> promoter / HA-Bcl-xL wt / 3'UTR       | COP287, COP297,COP672,COP689        |
| <i>unc-119 ced-9</i> promoter / HA-Bcl-xL(S49A) / 3'UTR    | COP285, COP286,COP322               |
| <i>unc-119 ced-9</i> promoter / HA-Bcl-xL(S62A) / 3'UTR    | COP355, COP690,COP691               |
| <i>unc-119 ced-9</i> promoter / HA-Bcl-xL(S49D) / 3'UTR    | COP288, COP298,COP310               |
| <i>unc-119 ced-9</i> promoter / HA-Bcl-xL(S62D) / 3'UTR    | COP289,COP290,COP295, COP299,COP311 |
| <i>unc-119 ced-9</i> promoter / HA-Bcl-xL(S49/62A) / 3'UTR | COP291,COP293,COP300, COP301,COP312 |
| <i>unc-119 ced-9</i> promoter / HA-Bcl-xL(S49/62D) / 3'UTR | none                                |
